# Supplementary material for: Meta-Analysis of Adipose Tissue Derived Cell-Based Therapy for the Treatment of Knee Osteoarthritis
Source: MDPI journal article supplement (doi:10.3390/cells10061365), 2021-06-01
Supplement: s1 [file s1]

**Supplementary Table 1:** Critical appraisal of the non-randomised studies included in this systematic review, using the ROBINS-1 tool n = 13.

| Paper                       | Bias due to confounding | Bias in selection of participants into the study | Bias in classification of interventions | Bias due to deviations from intended interventions | Bias due to missing data | Bias in measurement of outcomes | Bias in selection of the reported result | Overall bias |
|-----------------------------|-------------------------|--------------------------------------------------|-----------------------------------------|----------------------------------------------------|--------------------------|---------------------------------|------------------------------------------|--------------|
| Jo et al (2014) [57]        | Low risk                | Low risk                                         | Low risk                                | Low risk                                           | Low risk                 | Low risk                        | Low risk                                 | Low risk     |
| Jo et al (2017) [56]        | Low risk                | Low risk                                         | Low risk                                | Low risk                                           | Low risk                 | Low risk                        | Low risk                                 | Low risk     |
| Pers et al (2016) [64]      | Low risk                | Low risk                                         | Low risk                                | Low risk                                           | Low risk                 | Low risk                        | Low risk                                 | Low risk     |
| Roato et al (2019) [66]     | Low risk                | Low risk                                         | Low risk                                | Low risk                                           | Low risk                 | Moderate risk                   | Low risk                                 | Low risk     |
| Koh et al (2013) [69]       | Low risk                | Low risk                                         | Low risk                                | Low risk                                           | Low risk                 | Moderate risk                   | Low risk                                 | Low risk     |
| Panni et al (2019) [71]     | Low risk                | Low risk                                         | Low risk                                | Low risk                                           | Moderate risk            | Moderate risk                   | Low risk                                 | Low risk     |
| Yokota et al (2019) [72]    | Low risk                | Low risk                                         | Low risk                                | Low risk                                           | Low risk                 | Low risk                        | Low risk                                 | Low risk     |
| Spasovski et al (2018) [68] | Low risk                | Low risk                                         | Low risk                                | Low risk                                           | Low risk                 | Moderate risk                   | Low risk                                 | Low risk     |
| Nguyen et al (2016) [70]    | Low risk                | Low risk                                         | Low risk                                | Low risk                                           | Low risk                 | Moderate risk                   | Low risk                                 | Low risk     |
| Yokota et al (2017) [58]    | Low risk                | Low risk                                         | Low risk                                | Low risk                                           | Low risk                 | Moderate risk                   | Low risk                                 | Low risk     |
| Bansal et al (2017) [60]    | Low risk                | Low risk                                         | Low risk                                | Low risk                                           | Low risk                 | Moderate risk                   | Low risk                                 | Low risk     |
| Tran et al (2019) [61]      | Low risk                | Low risk                                         | Low risk                                | Low risk                                           | Low risk                 | Moderate risk                   | Low risk                                 | Low risk     |
| Hudetz et al (2019) [63]    | Low risk                | Low risk                                         | Low risk                                | Low risk                                           | Low risk                 | Moderate risk                   | Low risk                                 | Low risk     |

Supplementary Table 2: Critical appraisal of the randomised studies included in this systematic review, using the RoB-2 tool n = 5

| <b>Papers</b>                | <b>1.0 algorithm<br/>result</b> | <b>2.0 algorithm<br/>result</b> | <b>3.0 algorithm<br/>result</b> | <b>4.0 algorithm<br/>result</b> | <b>5.0 algorithm<br/>result</b> | <b>Algorithm's<br/>overall<br/>judgement</b> |
|------------------------------|---------------------------------|---------------------------------|---------------------------------|---------------------------------|---------------------------------|----------------------------------------------|
| Song et al<br>(2018) [38]    | Low                             | Low                             | Low                             | Low                             | Low                             | Low                                          |
| Freitag et al<br>(2019) [65] | Some                            | Some                            | Low                             | Low                             | Low                             | Low                                          |
| Lee et al<br>(2019) [67]     | Low                             | Low                             | Low                             | Low                             | Low                             | Low                                          |
| Garza et al<br>(2020) [59]   | Low                             | Low                             | Low                             | Low                             | Low                             | Low                                          |
| Hong et al<br>(2019) [62]    | Low                             | Some                            | Low                             | Low                             | Low                             | Low                                          |
